# Supplementary material for: The Biocatalytic Production of 3-Hydroxypropionaldehyde and Evaluation of Its Stability
Source: MDPI journal article supplement (doi:10.3390/catal11101139), 2021-09-23
Supplement: s1 [file s1]

Supplementary Table S1. Comparison of 3-HPA bioconversion factors by *L. reuteri* strains

| Strain                         | Glycerol<br>(mM) | 3-HPA<br>(mM) | Yield<br>(% mol/mol) | Reaction time<br>(min) | Reference  |
|--------------------------------|------------------|---------------|----------------------|------------------------|------------|
| <i>L. reuteri</i> ATCC 53608   | 400              | 235           | 58.8                 | 45                     | [1]        |
| <i>L. reuteri</i> ATCC 53608   | 200              | 170           | 85.0                 | 120                    | [2]        |
| <i>L. reuteri</i> 1063         | 250              | 140           | 56.0                 | 120                    | [3]        |
| <i>L. reuteri</i> NRRL B-14171 | 150              | 80            | 53.3                 | 480                    | [4]        |
| <i>L. reuteri</i> CG001        | 200              | 195           | 97.5                 | 60                     | [5]        |
| <i>L. reuteri</i> DSM 20016    | 250              | 180           | 72.0                 | 60                     | [6]        |
| <i>L. reuteri</i> BR201        | 500              | 378           | 75.6                 | 60                     | This study |

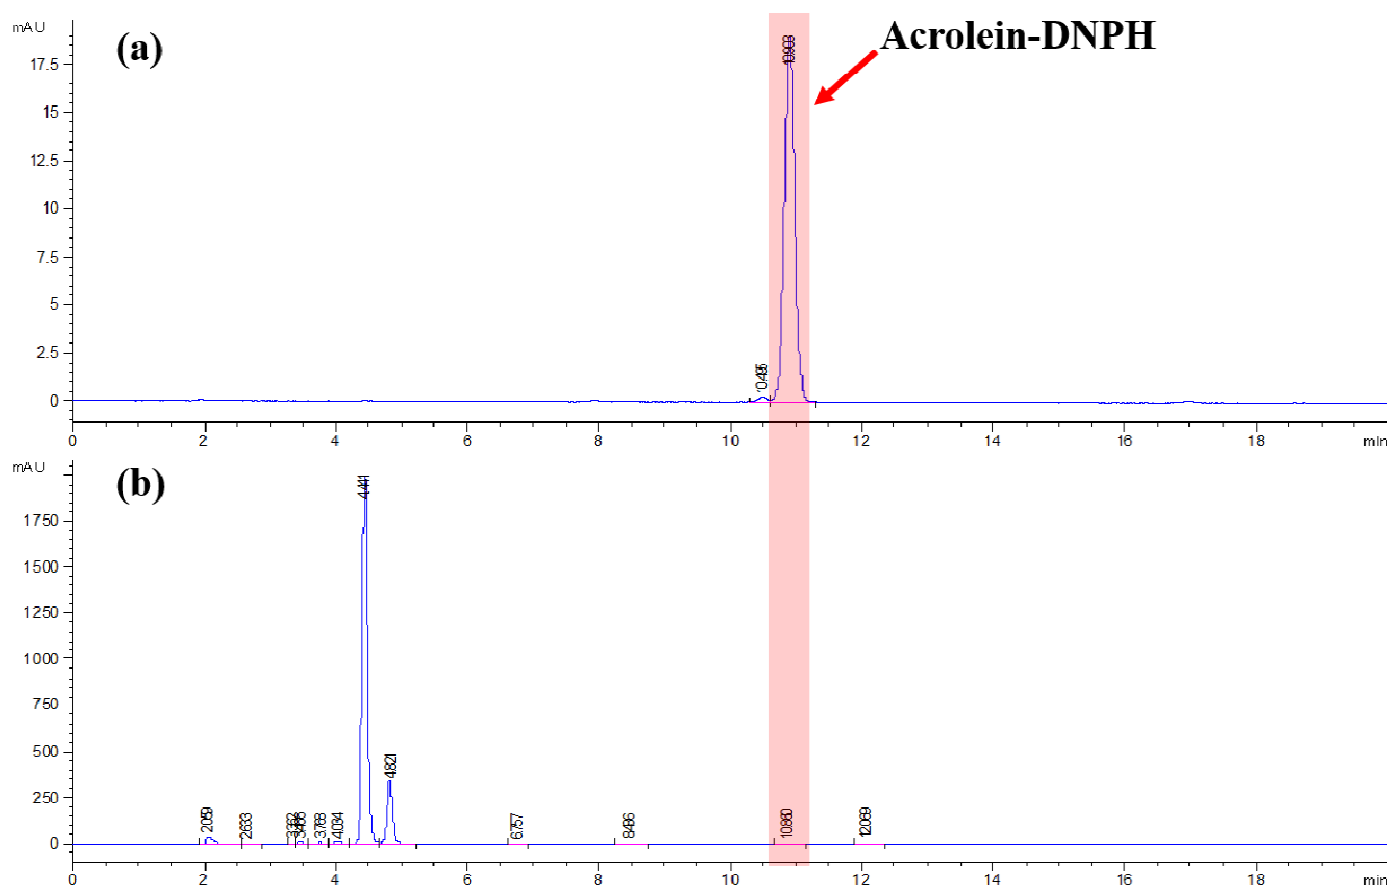

Supplementary Figure S1. Acrolein analysis HPLC chromatogram by DNPH derivatization. Acrolein-DNPH standard of 1 mg/L (a) and DNPH derivatized 3-HPA bioconversion sample (b).

## References:

1. Doleyes, Y.; Beck, P.; Vollenweider, S.; Lacroix, C. Production of 3-Hydroxypropionaldehyde Using a Two-Step Process with *Lactobacillus reuteri*. *Appl. Microbiol. Biotechnol.* 2005, 68, 467–474.
2. Lüthi-Peng, Q.; Schärer, S.; Puhán, Z. Production and Stability of 3-Hydroxypropionaldehyde in *Lactobacillus reuteri*. *Appl. Microbiol. Biotechnol.* 2002, 60, 73–80.
3. Talarico, T.L.; Casas, I.A.; Chung, T.C.; Dobrogosz, W.J. Production and Isolation of Reuterin, a Growth Inhibitor Produced by *Lactobacillus reuteri*. *Antimicrob. Agents Chemother.* 1988, 32, 1854–1858.
4. Zamudio-Jaramillo, M.A.; Hernandez-Mendoza, A.; Robles, V.J.; Mendoza-Garcia, P.G.; Espinosa-De-Los-Monteros, J.J.; Garcia, H.S. Reuterin Production by *Lactobacillus reuteri* NRRL B-14171 Immobilized in Alginate. *J. Chem. Technol. Biot.* 2009, 84, 100–105.
5. Chen, G.; Yang, D.M.; Xiao, Y.Q.; Chen, H.W. Influence of Conditions on Reuterin Accumulation by the Resting Cell Biotransformation Process. *Chinese. J. Chem. Eng.* 2011, 19, 1023–1027.
6. Stevens, M.J.A.; Vollenweider, S.; Meile, L.; Lacroix, C. 1,3-Propanediol Dehydrogenases in *Lactobacillus reuteri*: Impact on Central Metabolism and 3-Hydroxypropionaldehyde Production. *Microb. Cell. Fact.* 2011, 10, 61.
